# Supplementary material
Source: publisher figshare collection journal article supplement (https://gsajournals.figshare.com/ndownloader/files/14393720)
Supplement: Supplementary file 1 [file 14393720]

## Sheet: Sheet1
Supplemental Table S1 - HTSeq Output. For each sample in this study, the HTSeq summary is presented.
	A x A-Female-1	A x A-Female-2	A x A-Female-3	A x A-Female-4	A x A-Male-1	A x A-Male-2	A x A-Male-3	R x R-Female-1	R x R-Female-2	R x R-Female-3	R x R-Female-4	R x R-Male-1	R x R-Male-2	R x R-Male-3	R x R-Male-4
Assigned to Gene	19359318	16224263	11435310	22264198	4404216	21283137	18197305	21082702	24167135	20177497	20697028	23454091	14628376	13317893	25608943
No Feature	6387655	5564001	4958955	7681528	1728694	8430513	6354957	7327134	8193147	7273313	6688943	7561315	5223170	4594020	7411719
Ambiguous	2424059	2587864	1685853	3456352	562974	2671723	2737885	2763111	3083244	2528641	2949170	2953888	1690819	2054406	3671981
Alignment Quality too low	2477767	3099576	1929775	3631296	573979	2580281	3171781	2650544	2769878	2443650	3063586	2511246	1163049	2275053	3711242
Not Aligned	11594796	10389388	7522300	12345323	2553550	13062528	12673724	10571860	12101573	13669807	11711170	9312767	8378154	8637742	11904002
Alignment not Unique	6818238	6193377	6217941	8536480	1652251	10137861	6842918	7905864	8613011	7375776	7414088	7528466	5010947	4686097	8941042
Average Assigned to Gene	1.84201e+07
Minimum	4404216
Maximum	25608943
